# Supplementary material
Source: PubMed Central journal article supplement (PMC1720179)
Supplement: archdisch_90_11_1206__1.pdf [file archdisch_90_11_1206__1.pdf]

## Survey of use of Melatonin

- 1[a] How many of your patients are currently taking MELATONIN? \_\_\_\_\_ Patients.  
 [b] How many did you start yourself? \_\_\_\_\_ Patients.  
 [c] How many were started by;

| Community Paediatrician | Child Psychiatrist | General Practitioner | Other (Specify) |
|-------------------------|--------------------|----------------------|-----------------|
|                         |                    |                      |                 |

- 2 Have you prescribe Melatonin in the last year? YES/NO  
 [a] If YES, how many new prescriptions issued over this period? \_\_\_\_\_ /Year  
 [b] If NO, why not?

3 How old are your MELATONIN-TREATED patients?

| Youngest | <=5yrs | 6-10yrs | 11-15yrs | 16+yrs | Eldest |
|----------|--------|---------|----------|--------|--------|
|          |        |         |          |        |        |

4 What are your PRINCIPAL INDICATIONS for this treatment?

5 Please list by frequency the THREE most common disorders in your melatonin group?

1. \_\_\_\_\_ 2. \_\_\_\_\_ 3. \_\_\_\_\_

6 What measures do you normally try BEFORE melatonin? \_\_\_\_\_  
 \_\_\_\_\_

7 How/Why do you usually stop melatonin? \_\_\_\_\_  
 \_\_\_\_\_

- 8 Clinical use [a] Usual starting dose \_\_\_\_\_mg  
 [b] Usual maintenance dose range \_\_\_\_\_ to \_\_\_\_\_mg/day  
 [c] Highest Effective dose used \_\_\_\_\_mg  
 [d] Minutes before USUAL SETTling time given \_\_\_\_\_ minutes  
 [e] Formulation used immediate release; slow release; both (circle)  
 [f] Name if melatonin preparation (if known) \_\_\_\_\_

9 Have any of your patients experienced any side effects? YES/NO  
 Describe these \_\_\_\_\_

10 What information do you give parents? \_\_\_\_\_  
 (if written information provided please attach copy)

11 Do local GP's prescribe melatonin under your supervision?  
 Always; usually; sometimes; rarely; never (circle)

12 Is melatonin EXCLUDED by your local formulary? YES/NO

13 Please circle the phrase that best sums up your view concerning the overall efficacy of melatonin  
 always effective; usually effective; rarely effective; ineffective; not applicable

14 Any other comments or further information?
